# Supplementary material for: Effect of Esketamine Added to Propofol Sedation on Desaturation and Hypotension in Bidirectional Endoscopy: A Randomized Clinical Trial
Source: PubMed Central journal article supplement (PMC10733809; doi:10.1001/jamanetworkopen.2023.47886), 2023-12-20
Supplement: jamanetwopen-e2347886-s002.pdf [file jamanetwopen-e2347886-s002.pdf]

## Data Sharing Statement

Song. Effect of Esketamine Added to Propofol Sedation on Desaturation and Hypotension in Bidirectional Endoscopy. *JAMA Netw Open*. Published December 20, 2023.

doi:10.1001/jamanetworkopen.2023.47886

### Data

**Data available:** Yes

**Data types:** Deidentified participant data

**How to access data:** The data that support the findings of this study are available from the corresponding author upon reasonable request. Ke Peng: [pengke0422@163.com](mailto:pengke0422@163.com)

**When available:** With publication

### Supporting Documents

**Document types:** None

### Additional Information

**Who can access the data:** researchers whose proposed use of the data has been approved

**Types of analyses:** for any purpose

**Mechanisms of data availability:** after approval of a proposal
